# Supplementary material for: A negative feedback loop is critical for recovery of RpoS after stress in Escherichia coli
Source: PubMed Central journal article supplement (PMC10957080; doi:10.1371/journal.pgen.1011059), 2024-03-11

Supplemental Fig S2

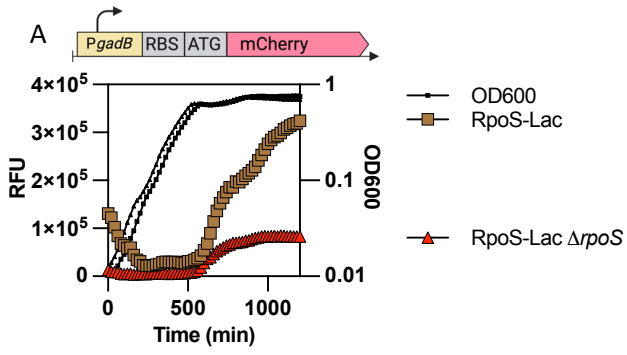

**B** Phosphate starvation and recovery in presence or absence of RpoS (chase)

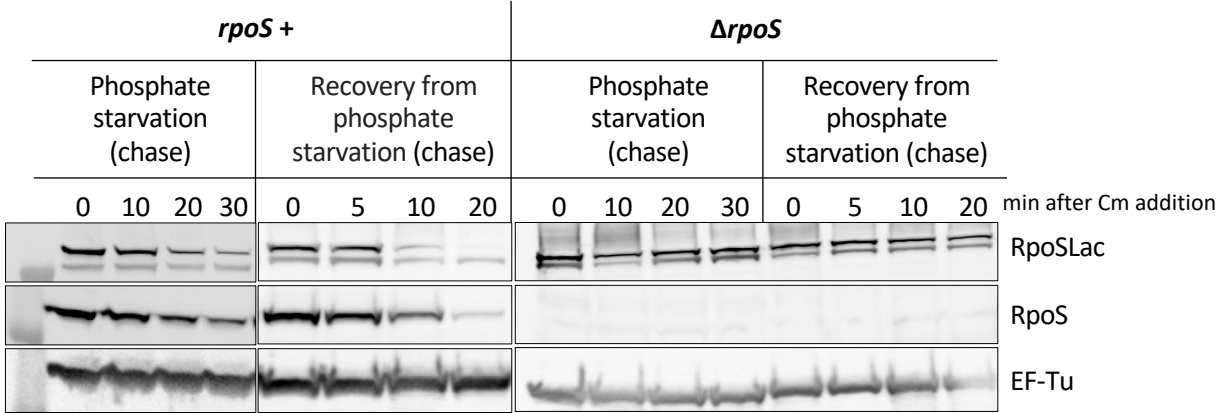

**C** Phosphate starvation (chase)

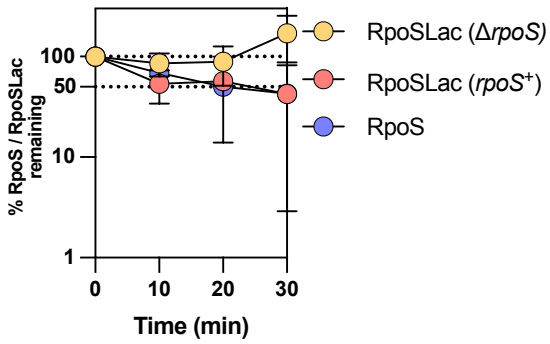

**D** Recovery phosphate starvation (chase)

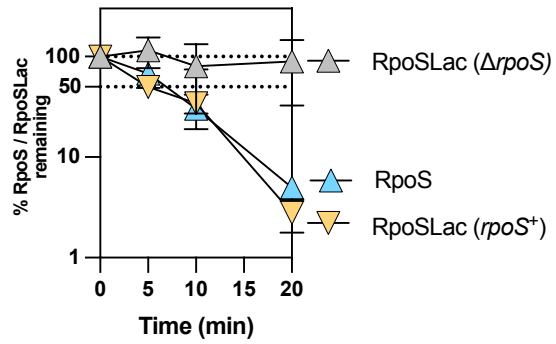

Supplement: pgen.1011059.s002.pdf [file pgen.1011059.s002.pdf]
