# Supplementary material for: A negative feedback loop is critical for recovery of RpoS after stress in Escherichia coli
Source: PubMed Central journal article supplement (PMC10957080; doi:10.1371/journal.pgen.1011059), 2024-03-11
Supplement: pgen.1011059.s005.pdf [file pgen.1011059.s005.pdf]

**Supplemental Fig S5**

**A Recovery from phosphate starvation (chase)**

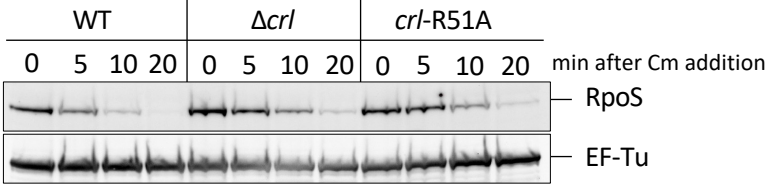

**B Recovery from glucose starvation (chase)**

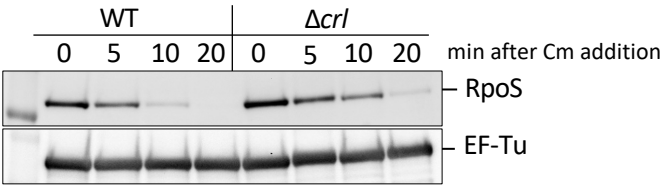

**C Phosphate starvation - chase**

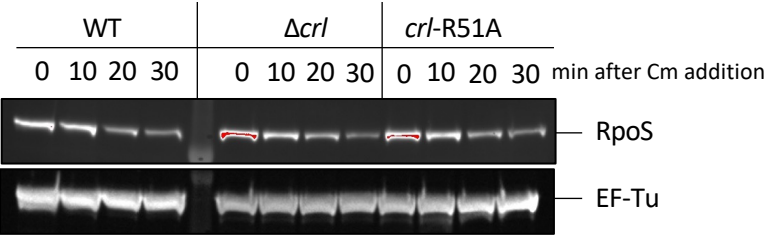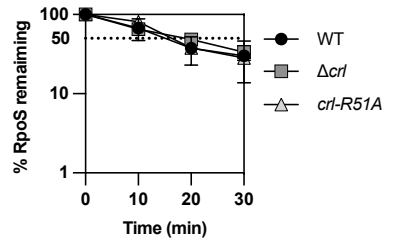

**D Glucose starvation - chase**

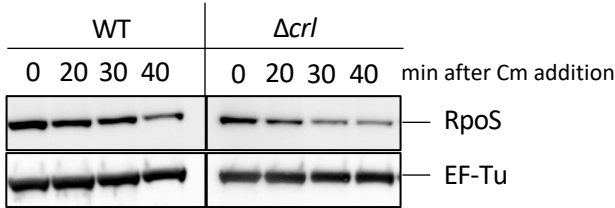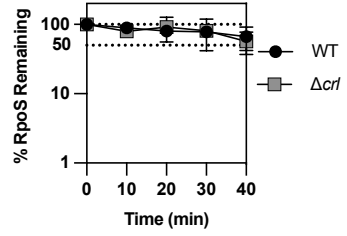

**E**

| RpoS half-lives (min) | Phosphate starvation |          | Glucose starvation |          |
|-----------------------|----------------------|----------|--------------------|----------|
|                       | Stress               | Recovery | Stress             | Recovery |
| WT                    | 17                   | 5.5      | > 40               | 5.5      |
| $\Delta crl$          | 20                   | 11       | > 40               | 9        |
| <i>crl</i> -R51A      | 17                   | 11       | ND                 | ND       |
