# Supplementary material for: A negative feedback loop is critical for recovery of RpoS after stress in Escherichia coli
Source: PubMed Central journal article supplement (PMC10957080; doi:10.1371/journal.pgen.1011059), 2024-03-11

Supplemental Fig S6

A Bacterial two-hybrid assay

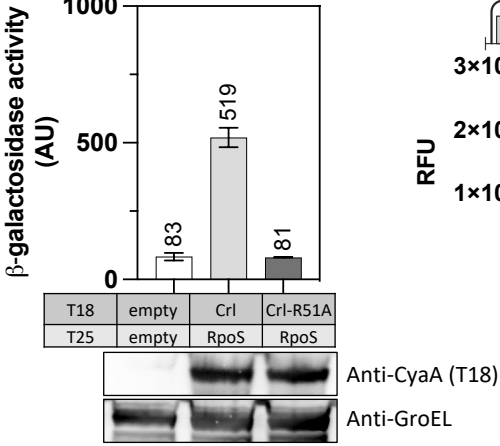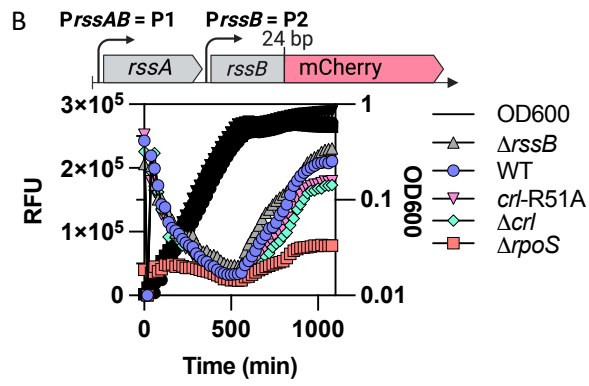

C Recovery from phosphate starvation

*rpoS* +

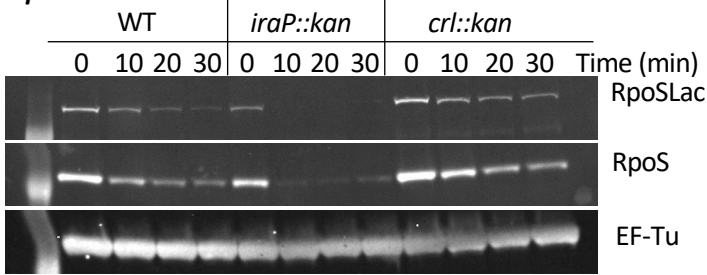

$\Delta rpoS$

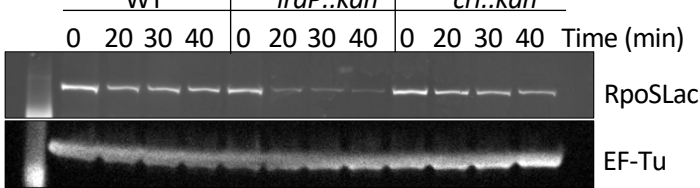

$\Delta rpoS$  *rssA2::cm*

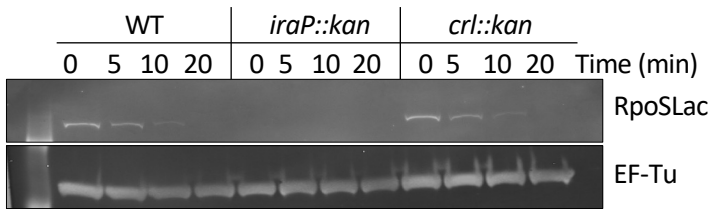

D Phosphate starvation

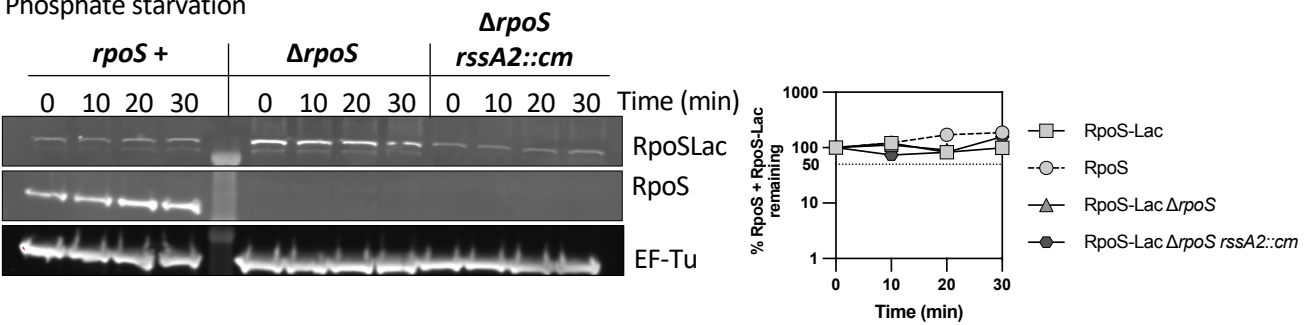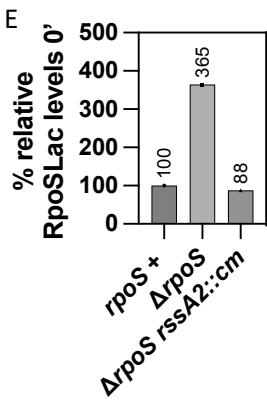

Supplement: pgen.1011059.s006.pdf [file pgen.1011059.s006.pdf]
