# Supplementary material for: A negative feedback loop is critical for recovery of RpoS after stress in Escherichia coli
Source: PubMed Central journal article supplement (PMC10957080; doi:10.1371/journal.pgen.1011059), 2024-03-11

Supplemental Fig S7

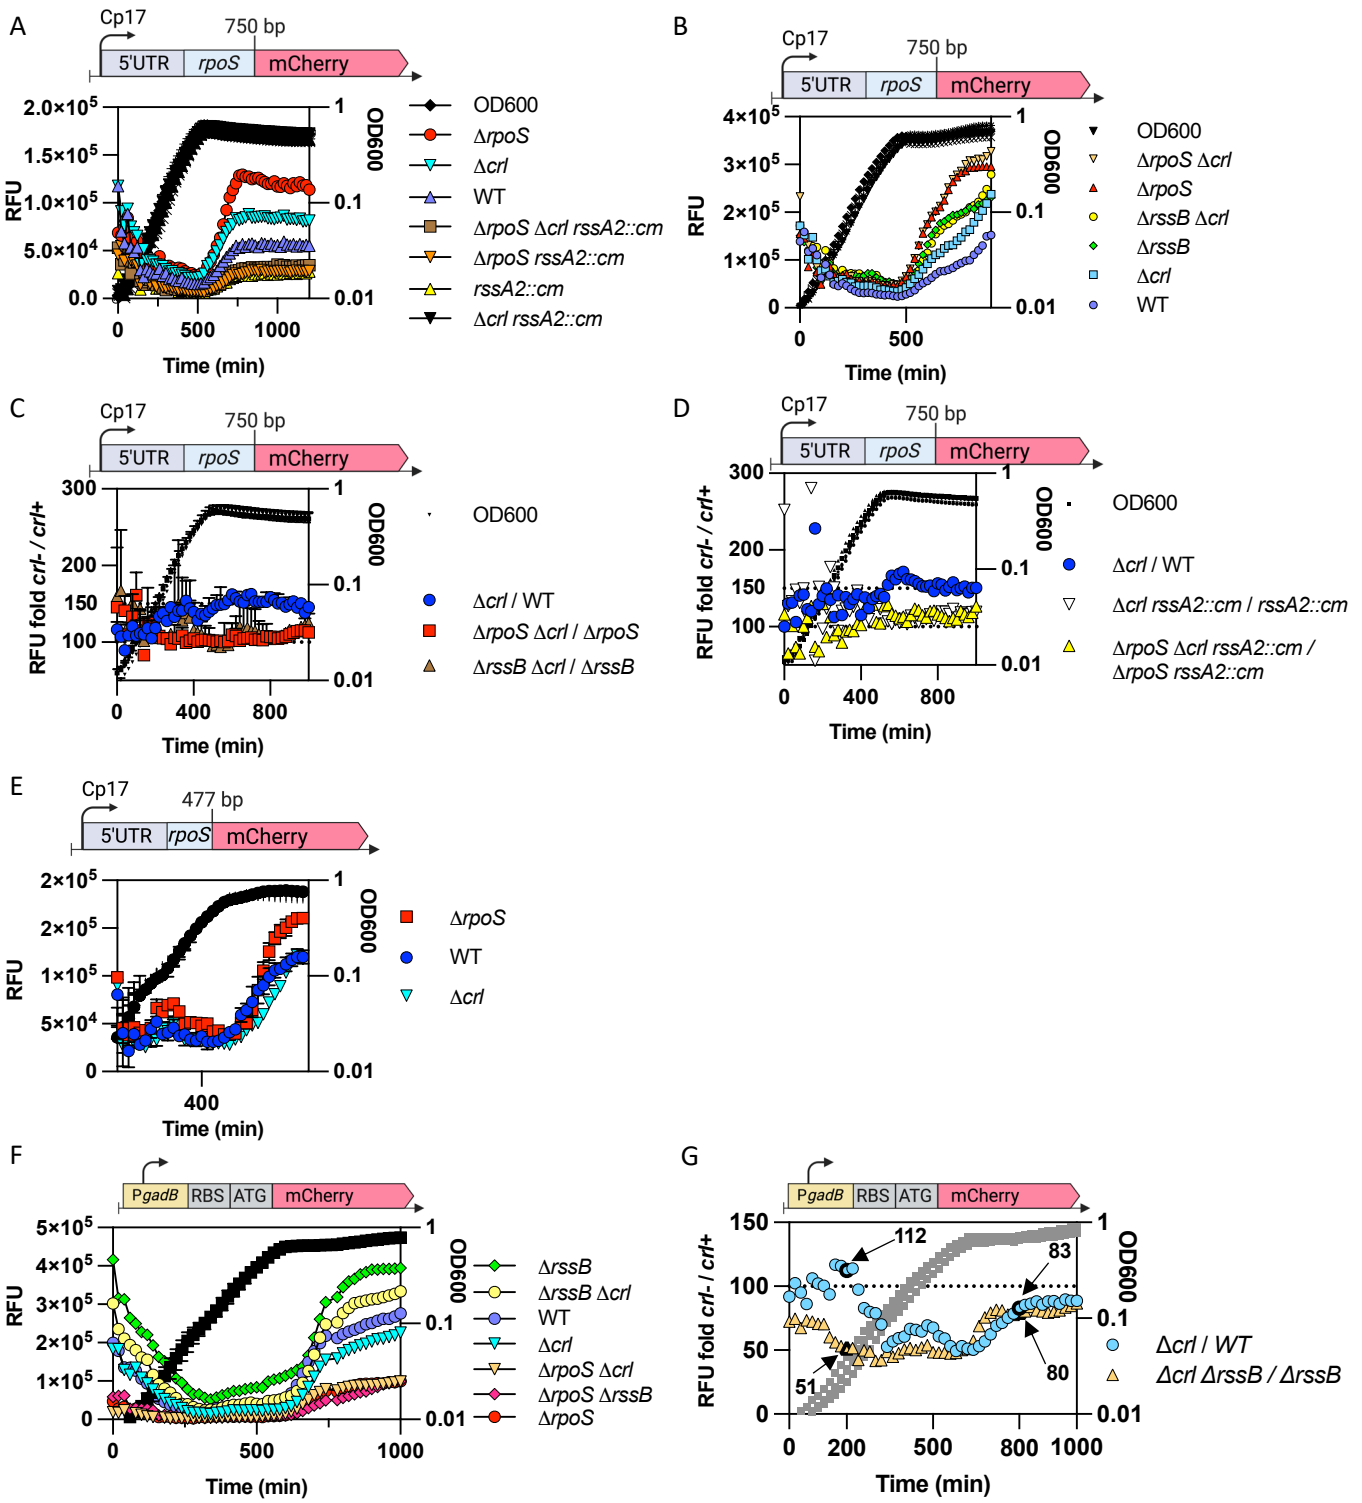

Supplement: pgen.1011059.s007.pdf [file pgen.1011059.s007.pdf]
