# Supplementary material for: A negative feedback loop is critical for recovery of RpoS after stress in Escherichia coli
Source: PubMed Central journal article supplement (PMC10957080; doi:10.1371/journal.pgen.1011059), 2024-03-11
Supplement: pgen.1011059.s010.pdf [file pgen.1011059.s010.pdf]

**Supplemental Table S1: Strains used in this study**

| Strains ID | Genotype                                                                                                             | Reference                                                                       |
|------------|----------------------------------------------------------------------------------------------------------------------|---------------------------------------------------------------------------------|
| MG1655     | MG1655 <i>crl</i> +                                                                                                  | S Gottesman lab collection                                                      |
| BTH101     | F- <i>cya</i> - 99 <i>araD139 galE15 galK16 rpsL1</i> (StrR) <i>hsdR2 mcrA1 mcrB1 relA1</i>                          | Karimova et al, 1998                                                            |
| NM801      | MG1655 <i>zeo</i> -Cp17- <i>rpoS</i> <sub>750</sub> - <i>mCherry</i> at <i>lac</i> site                              | <i>zeo</i> -Cp17- <i>rpoS</i> <sub>750</sub> PCR fragment + NRD1166             |
| NM802      | MG1655 <i>zeo</i> -Cp17- <i>rpoS</i> <sub>477</sub> - <i>mCherry</i> at <i>lac</i> site                              | <i>zeo</i> -Cp17- <i>rpoS</i> <sub>477</sub> PCR fragment + NRD1166             |
| NM1100     | MG1655 <i>mini</i> -λ:: <i>tet Δcrl::IS</i>                                                                          | MG1655 electroporated with <i>mini</i> -λ:: <i>tet</i>                          |
| NRD1116    | MG1655 <i>zeo</i> - <i>kan</i> - <i>pBAD-ccdB</i> - <i>mCherry</i> at the <i>lac</i> site <i>mini</i> λ:: <i>tet</i> | Walling et al , 2022                                                            |
| JW0230     | BW25113 <i>Δcrl::kan</i>                                                                                             | Keio collection; Baba et al, 2006                                               |
| JW0232     | BW25113 <i>ΔproB::kan</i>                                                                                            | Keio collection; Baba et al, 2006                                               |
| JW0377     | BW25113 <i>ΔproC::kan</i>                                                                                            | Keio collection; Baba et al, 2006                                               |
| JW1252     | BW25113 <i>ΔtrpA::kan</i>                                                                                            | Keio collection; Baba et al, 2006                                               |
| SG30013    | MG1655 <i>zeo</i> -Cp17- <i>rpoS</i> <sub>750</sub> - <i>lacZ</i> at <i>lambda</i> site                              | Zhou and Gottesman, 2006                                                        |
| AB006      | MG1655 <i>ΔiraP::Kan</i>                                                                                             | Bougdour et al , 2006                                                           |
| AB011      | CRB316 <i>rssA2::cm</i>                                                                                              | Bougdour et al , 2006                                                           |
| AB023      | MG1655 <i>iraM::kan</i>                                                                                              | Bougdour et al, 2008                                                            |
| AB046      | MG1655 <i>iraD::tet</i>                                                                                              | Bougdour et al, 2008                                                            |
| AB165      | MG1655 <i>ΔrpoS::tet</i>                                                                                             | Bougdour et al , 2006                                                           |
| BA124      | BTH101 <i>rssA2::cm</i>                                                                                              | P1 (AB011) + BTH101                                                             |
| BA754      | MG1655 <i>Zeo</i> -Cp17- <i>rpoS</i> +1( <i>in nlpD</i> )786- <i>lacZ</i> (9th codon)                                | Majdalani et al , 2023                                                          |
| INH23      | MG1655 <i>Δcrl::kan</i>                                                                                              | P1(JW0230) + MG1655                                                             |
| INH24      | MG1655 <i>Δcrl::FRT</i>                                                                                              | pCP20 + INH23                                                                   |
| INH26      | MG1655 <i>Δcrl::FRT ΔiraP::Kan</i>                                                                                   | P1 (AB006) + INH24                                                              |
| INH28      | MG1655 <i>zeo</i> -Cp17- <i>rpoS</i> <sub>750</sub> - <i>lacZ ΔrpoS::tet</i>                                         | P1 (AB165) + SB30013                                                            |
| AT59       | MG1655 <i>Δcrl::IS</i>                                                                                               | S Gottesman lab collection                                                      |
| AT82       | MG1655 <i>Δcrl::IS ΔrssB::tet</i>                                                                                    | P1 (BTH101 <i>ΔrssB::tet</i> )+AT59                                             |
| AT485      | NM1100 <i>ΔrssB-N1-168AA::kan-pBAD-Kid mini</i> λ:: <i>tet</i>                                                       | <i>ΔrssB-N1-168AA::kan-pBAD-Kid</i> PCR fragment (primers AT249+AT254) + NM1100 |
| AT596      | MG1655 <i>rssA2::cm</i>                                                                                              | P1 (BA124) + MG1655                                                             |
| SB55       | MG1655 <i>Δcrl::IS zeo</i> - <i>PgadB</i> - <i>mCherry</i> at <i>lac</i> site                                        | <i>PgadB</i> fragment PCR (primers SB14+SB15) + NRD1116                         |
| SB66       | MG1655 <i>zeo</i> - <i>PgadB</i> - <i>mCherry</i> at <i>lac</i> site                                                 | P1 (SB55) + MG1655                                                              |
| SB67       | MG1655 <i>ΔrpoS::tet zeo</i> - <i>PgadB</i> - <i>mCherry</i> at <i>lac</i> site                                      | P1 (AB165) + SB66                                                               |
| SB71       | BTH101 <i>ΔrpoS::kan ΔrssB::tet</i>                                                                                  | P1 (AT82) + BTH101 <i>ΔrpoS::kan</i>                                            |
| SB94       | MG1655 <i>ΔrssB::tet</i>                                                                                             | P1 (AT82) + MG1655                                                              |
| SB98       | NM1100 <i>Δcrl::kan-pBAD-ccdB</i>                                                                                    | <i>Δcrl::kan-pBAD-ccdB</i> PCR fragment (primers SB24+SB39) + NM1100            |
| SB124      | MG1655 <i>ΔproB::kan</i>                                                                                             | P1 (JW0232)+MG1655                                                              |
| SB125      | MG1655 <i>ΔproC::kan</i>                                                                                             | P1 (JW0377)+MG1655                                                              |
| SB137      | NM1100 <i>crl</i> +                                                                                                  | gBlock SB-03 + SB98                                                             |
| SB138      | NM1100 <i>Δcrl</i>                                                                                                   | gBlock SB-02 + SB98                                                             |
| SB139      | NM1100 <i>crl</i> - R51A                                                                                             | gBlock SB-01 + SB98                                                             |
| SB147      | MG1655 <i>Δcrl</i>                                                                                                   | P1 (SB138) + SB124                                                              |
| SB148      | MG1655 <i>crl</i> - R51A                                                                                             | P1 (SB139) + SB124                                                              |
| SB150      | MG1655 <i>zeo</i> -Cp17- <i>rpoS</i> <sub>750</sub> - <i>lacZ ΔrpoS::tet rssA2::cm</i>                               | P1 (AT596)+ INH28                                                               |
| SB151      | MG1655 <i>ΔiraP</i>                                                                                                  | P1 (AT596)+ INH28                                                               |
| SB164      | MG1655 <i>ΔtrpA::kan</i>                                                                                             | P1 (JW1252)+MG1655                                                              |
| SB173      | MG1655 <i>zeo</i> -Cp17- <i>rpoS</i> <sub>750</sub> - <i>lacZ ΔrpoS::tet rssA2::cm ΔiraP::kan</i>                    | P1 (AB006) + SB150                                                              |
| SB174      | MG1655 <i>zeo</i> -Cp17- <i>rpoS</i> <sub>750</sub> - <i>lacZ ΔrpoS::tet rssA2::cm Δcrl::kan</i>                     | P1 (INH23) + SB150                                                              |
| SB175      | MG1655 <i>zeo</i> -Cp17- <i>rpoS</i> <sub>750</sub> - <i>lacZ ΔrpoS::tet ΔiraP::kan</i>                              | P1 (AB006) + INH28                                                              |
| SB176      | MG1655 <i>zeo</i> -Cp17- <i>rpoS</i> <sub>750</sub> - <i>lacZ ΔrpoS::tet Δcrl::kan</i>                               | P1 (INH23) + INH28                                                              |
| SB179      | MG1655 <i>zeo</i> -Cp17- <i>rpoS</i> <sub>750</sub> - <i>lacZ ΔiraP::kan</i>                                         | P1 (AB006) + SG30013                                                            |
| SB180      | MG1655 <i>zeo</i> -Cp17- <i>rpoS</i> <sub>750</sub> - <i>lacZ Δcrl::kan</i>                                          | P1 (INH23) + SG30013                                                            |
| SB190      | MG1655 <i>rssB</i> - D58A                                                                                            | gBlock SB-10 + AT485                                                            |
| SB192      | MG1655 <i>rssB</i> - D58E                                                                                            | gBlock SB-9 + AT485                                                             |
| SB198      | MG1655 <i>rssB</i> - D58P                                                                                            | gBlock SB-8 + AT485                                                             |

**Supplemental Table S1: Strains used in this study (continued)**

| Strains ID | Genotype                                                                         | Reference                                                              |
|------------|----------------------------------------------------------------------------------|------------------------------------------------------------------------|
| SB212      | MG1655 <i>iraP-SPA</i>                                                           | Battesti et al, 2015                                                   |
| SB225      | MG1655 <i>zeo-Cp17-rpoS<sub>750</sub>-mCherry ΔrssB::tet</i>                     | P1 (AT82) + NM801                                                      |
| SB226      | MG1655 <i>zeo-Cp17-rpoS<sub>750</sub>-mCherry rssA2::cm</i>                      | P1(AT596) + NM801                                                      |
| SB228      | MG1655 <i>zeo-Cp17-rpoS<sub>750</sub>-mCherry Δcrl::kan</i>                      | P1 (INH23) + NM801                                                     |
| SB230      | MG1655 <i>zeo-Cp17-rpoS<sub>750</sub>-mCherry ΔproB::kan</i>                     | P1(JW0232) + NM801                                                     |
| SB238      | MG1655 <i>zeo-Cp17-rpoS<sub>750</sub>-mCherry ΔrpoS::tet</i>                     | P1 (AB165) + NM801                                                     |
| SB239      | MG1655 <i>zeo-Cp17-rpoS<sub>750</sub>-mCherry ΔrpoS::tet Δcrl::kan</i>           | P1 (INH23) + SB238                                                     |
| SB242      | MG1655 <i>ΔrssB::tet zeo-PgadB -mCherry at lac site</i>                          | P1 (AT82) + SB66                                                       |
| SB243      | MG1655 <i>Δcrl::kan zeo-PgadB -mCherry at lac site</i>                           | P1 (INH23) + SB66                                                      |
| SB280      | MG1655 <i>zeo-Cp17-rpoS<sub>750</sub>-mCherry ΔrpoS::tet Δcrl::kan rssA2::cm</i> | P1(AT596) + SB239                                                      |
| SB281      | MG1655 <i>zeo-Cp17-rpoS<sub>750</sub>-mCherry ΔrpoS::tet rssA2::cm</i>           | P1(AT596) + SB238                                                      |
| SB282      | MG1655 <i>zeo-Cp17-rpoS<sub>750</sub>-mCherry Δcrl::kan rssA2::cm</i>            | P1(AT596) + SB228                                                      |
| SB283      | MG1655 <i>zeo-Cp17-rpoS<sub>750</sub>-mCherry ΔrssB::tet Δcrl::kan</i>           | P1 (INH23) + SB225                                                     |
| SB296      | MG1655 <i>ΔrpoS::tet Δcrl::kan zeo-PgadB -mCherry at lac site</i>                | P1 (INH23) + SB67                                                      |
| SB297      | MG1655 <i>ΔrssB::tet Δcrl::kan zeo-PgadB -mCherry at lac site</i>                | P1 (INH23) + SB242                                                     |
| SB298      | MG1655 <i>ΔrssB::tet ΔrpoS::kan zeo-PgadB -mCherry at lac site</i>               | P1 ( <i>ΔrpoS::kan</i> ) + SB242                                       |
| SB364      | MG1655 <i>iraD::tet</i>                                                          | P1 (AB046) + MG1655                                                    |
| SB365      | MG1655 <i>iraD::tet ΔiraP</i>                                                    | P1 (AB046) + SB151                                                     |
| SB341      | MG1655 <i>zeo-Cp17-rpoS<sub>750</sub>-mCherry crl -R51A</i>                      | P1(SB148) + SB230                                                      |
| SB437      | MG1655 <i>zeo-Cp17-rpoS<sub>477</sub>-mCherry Δcrl::kan</i>                      | P1(INH23) + NM802                                                      |
| SB439      | MG1655 <i>zeo-Cp17-rpoS<sub>477</sub>-mCherry ΔrpoS::tet</i>                     | P1(AB165) + NM802                                                      |
| SB470      | MG1655 <i>ΔssrS::kan</i>                                                         | Storz lab collection                                                   |
| SB497      | NM1100 <i>Δrsd::kan-pBAD-ccdB Δcrl::IS</i>                                       | <i>Δrsd::kan-pBAD-ccdB</i> fragment PCR (primers SB196+SB197) + NM1100 |
| SB498      | NM1100 <i>Δrsd Δcrl::IS</i>                                                      | gBlock SB-47+ SB497                                                    |
| SB503      | NM1100 <i>Δrsd Δcrl::IS ΔproB::kan</i>                                           | P1 (JW0232) + SB498                                                    |
| SB505      | MG1655 <i>Δrsd crl+</i>                                                          | P1 (SB137) + SB503                                                     |
| SB539      | MG1655 <i>ΔiraM::kan</i>                                                         | P1 (AB023) + MG1655                                                    |
| SB540      | MG1655 <i>ΔiraP ΔiraM::kan</i>                                                   | P1 (AB023) + SB151                                                     |
| SB541      | MG1655 <i>ΔiraD::tet ΔiraM::kan</i>                                              | P1 (AB023) + SB364                                                     |
| SB542      | MG1655 <i>ΔiraP ΔiraD::tet ΔiraM::kan</i>                                        | P1 (AB023) + SB365                                                     |
