# Supplementary material for: A negative feedback loop is critical for recovery of RpoS after stress in Escherichia coli
Source: PubMed Central journal article supplement (PMC10957080; doi:10.1371/journal.pgen.1011059), 2024-03-11
Supplement: pgen.1011059.s011.pdf [file pgen.1011059.s011.pdf]

**Supplemental Table S2: Plasmids used in this study**

| <b>Vectors ID</b> | <b>Description</b>             | <b>Reference</b>            |
|-------------------|--------------------------------|-----------------------------|
| pSIM6             | mini $\lambda$ :: <i>amp</i>   | Hashimoto-Gotoh et al, 1981 |
| pUT18linker       | empty pUT18                    | Battesti et al, 2012        |
| pKT25linker       | empty pKT25                    | Battesti et al, 2012        |
| pQE80L            | empty pQE80L                   | Qiagen                      |
| pSB8              | pUT18- <i>crl</i>              | This work                   |
| pSB19             | pQE80L-mCherry                 | This work                   |
| pSB21             | pQE80L- <i>yodD</i> p-mCherry  | This work                   |
| pSB22             | pQE80L- <i>osmY</i> p-mCherry  | This work                   |
| pSB23             | pQE80L- <i>gadB</i> p-mCherry  | This work                   |
| pSB26             | pUT18- <i>crl</i> -R51A        | This work                   |
| pSB34             | pKT25- <i>rpoS</i>             | Battesti et al, 2013        |
| pSB37             | pQE80L- <i>rssAB</i> p-mCherry | This work                   |
| pSB38             | pQE80L- <i>osmE</i> p-mCherry  | This work                   |
| pSB48             | pQE80L- <i>rssB</i> p-mCherry  | This work                   |
