# Supplementary material for: A negative feedback loop is critical for recovery of RpoS after stress in Escherichia coli
Source: PubMed Central journal article supplement (PMC10957080; doi:10.1371/journal.pgen.1011059), 2024-03-11
Supplement: pgen.1011059.s012.pdf [file pgen.1011059.s012.pdf]

**Supplemental Table S3**

| Primers ID                       | Description (method)                                                                                                    | Sequences 5' - 3'                                                                  |
|----------------------------------|-------------------------------------------------------------------------------------------------------------------------|------------------------------------------------------------------------------------|
| SB-1                             | Forward <i>crl</i> -R51A (quickchange)                                                                                  | GCACCGGAAGTGGCCGAATTCTGGGGC                                                        |
| SB-2                             | Reverse <i>crl</i> -R51A (quickchange)                                                                                  | GCCCCAGAATTCGGCCACTCCGGTGC                                                         |
| SB-14                            | Forward <i>PgadB</i> (Transformation into NRD1116 strain)                                                               | ATACTATGCCGATATACTATGCCGATGATTAATTGTCAACCATAT<br>TGTATTGTTTTTCAA                   |
| SB-15                            | Reverse <i>PgadB</i> (Transformation into NRD1116 strain / Gibson into pQE80L-mCherry in combination with SB-33 primer) | tgatgatggccatggttatcctcctcgcccttgctcaccatagctgACCTCCTAAAA<br>TGATTGGATCGCAT        |
| SB-24                            | Forward <i>crl::kan-pBAD-ccdB</i> (transformation into NM1100 strain)                                                   | CCAATTTGGTAAAAACAGTTGCATCACAAACAGGAGATAGCATTAG<br>AAGAACTCGTCAAGAA                 |
| SB-39                            | Reverse <i>crl::kan-pBAD-ccdB</i> (transformation into NM1100 strain)                                                   | AATGAATATTGCCGATGTGATGCATCCGGCACATTTCACTtatatt<br>cccagaacatca                     |
| SB-28                            | Reverse pQE80L (Gibson with mCherry)                                                                                    | TTTCTCGAGGTGAAGACGAAAGGGCCTCGTGATAC                                                |
| SB-29                            | Forward pQE80L (Gibson with mCherry)                                                                                    | CTTGACTCCTGTGATAGATCCAGTAATGACCTC                                                  |
| SB-30                            | Forward mCherry (Gibson with pQE80L)                                                                                    | CTTCACCTCGAGAAAAGGAGGTcagctATGGTGAGCAAGGGCGA<br>GGA                                |
| SB-31                            | Reverse mCherry (Gibson with pQE80L)                                                                                    | CAACAGGAGTCCAAGCTACTTGTACAGCTCGTCCA                                                |
| SB-33                            | Forward <i>PgadB</i> (Gibson)                                                                                           | CTTCACCTCGAGAAACATATTGTATTGTTTTTCAA                                                |
| SB-34                            | Forward <i>PosmY</i> (Gibson)                                                                                           | CTTCACCTCGAGAAATATGTTTTCGCTGATATCCC                                                |
| SB-17                            | Reverse <i>PosmY</i> (Gibson)                                                                                           | tgatgatggccatggttatcctcctcgcccttgctcaccatagctgACCTCCTGTAT<br>GTTTGCTCGTAATT        |
| SB-37                            | Forward <i>PyodD</i> (Gibson)                                                                                           | CTTCACCTCGAGAAACGTTTTCTCCTGTGGCTTT                                                 |
| SB-196                           | Reverse <i>PyodD</i> (Gibson)                                                                                           | tgatgatggccatggttatcctcctcgcccttgctcaccatagctgACCTCCTCAAC<br>CGTTACTCTGTTGT        |
| SB-197                           | Forward <i>PosmE</i> (Gibson)                                                                                           | CTTCACCTCGAGAAATGAACCCCTCCAGACAGAAA                                                |
| SB-47                            | Reverse <i>PosmE</i> (Gibson)                                                                                           | CATagctgACCTCCTATTCCGTCCTCTTGTATC                                                  |
| SB-38                            | Forward promoters (Gibson with pQE80L-mCherry)                                                                          | AGGAGGTcagctATGGTGAGCAAGGGCGAGGAGGA                                                |
| SB-43                            | Forward <i>PrssB</i> (Gibson with pQE80L-mCherry)                                                                       | AGGAGGTcagctATGCGTTGGAGTGAATGCATTGC                                                |
| SB-44                            | Reverse <i>PrssB</i> (Gibson with pQE80L-mCherry)                                                                       | CTCGCCCTTGCTCACTTTCCGACCAATGGCTGCG                                                 |
| SB-45                            | Reverse pQE80L-mCherry (Gibson with <i>PrssB</i> )                                                                      | CATagctgACCTCCTTTCTCGAGGTGAAGACGAA                                                 |
| SB-66                            | Forward pQE80L-mCherry (Gibson with <i>PrssB</i> )                                                                      | GTGAGCAAGGGCGAGGAGGATAACATGGCCATCAT                                                |
| SB-72                            | Forward pQE80L inserts (sequencing)                                                                                     | CTTCGTTCCACTCGAG                                                                   |
| SB-74                            | Reverse pQE80L inserts (sequencing)                                                                                     | CCTCCTCGCCCTTGCTC                                                                  |
| SB-92                            | Reverse pSB37 (Gibson with GB-SB005 = ΔP2 <i>PrssB</i> )                                                                | CCGATTTGCGCATACTGAATGGTTGGGATTGACC                                                 |
| SB-93                            | Forward pSB37 (Gibson with GB-SB005 = ΔP2 <i>PrssB</i> )                                                                | GAGAAAGATAAAAATAGGGCTGGCGCTGGGATCTG                                                |
| SB-94                            | Reverse pSB37 (Gibson with GB-SB006 = ΔP1 <i>PrssB</i> )                                                                | GATATTTGCGGGCAAACAGGTTGAATCAGAATATC                                                |
| SB-95                            | Forward pSB37 (Gibson with GB-SB006 = ΔP1 <i>PrssB</i> )                                                                | CGAGATCGAGGGCGAGGGCGAGGGCCGCCCTACG                                                 |
| SB-196                           | Forward <i>rsd::kan-pBad-ccdB</i> (transformation into NM1100)                                                          | TCACTGAGCAGTTTTTGAATACAAACTTGCGGAGTCAATCtagaa<br>gaactcgtcaagaa                    |
| SB-197                           | Reverse <i>rsd::kan-pBad-ccdB</i> (transformation into NM1100)                                                          | TGGGGCATTGAATGTAAATTACGCGTTAACAGCGCAGAACTata<br>ttccccagaacatca                    |
| AT249                            | Forward Δ <i>rssB</i> -N1-168AA:: <i>kan-pBAD-Kid</i> (Transformation into NM1100)                                      | AGCATGCCACTATTGAGTAAAGCCAGTCAGGGGAGAGAACTTA<br>GAAGAACTCGTCAAGAA                   |
| AT254                            | Reverse Δ <i>rssB</i> -N1-168AA:: <i>kan-pBAD-Kid</i> (Transformation into NM1100)                                      | CCGCGGCAACCAATTGACGATAATTAACCCGGCAATGGGATCAA<br>GTCAGAATAGTGACA                    |
| RpoS750-<br>mCherNRD1<br>166F    | Forward <i>zeo-Cp17-rpoS750</i> (Transformation into NRD1166)                                                           | ATA CTA TGC CGA TAT ACT ATG CCG ATG ATT AAT TGT CAA<br>CCA TTC TGG AGT TTA TTC TT  |
| RpoS750-<br>mCherNRD1<br>166R    | Reverse <i>zeo-Cp17-rpoS750</i> (Transformation into NRD1166)                                                           | CCT TGA TGA TGG CCA TGT TAT CCT CCT CGC CCT TGC TCA<br>CCG TGG TAT CTT CCG GAC CGT |
| zeo-F                            | Forward <i>zeo</i> (Sequencing)                                                                                         | CTCCACGAAGTCCCGGGAGA                                                               |
| Int-mCh-<br>sequencing<br>primer | Reverse <i>mCherry</i> (Sequencing)                                                                                     | CTTGGTCACTTCAGCTTGG                                                                |
