# Supplementary material for: A negative feedback loop is critical for recovery of RpoS after stress in Escherichia coli
Source: PubMed Central journal article supplement (PMC10957080; doi:10.1371/journal.pgen.1011059), 2024-03-11
Supplement: pgen.1011059.s013.pdf [file pgen.1011059.s013.pdf]

Supplemental Table S4

| gBlocks ID | Description                                                                                                | Sequences 5' - 3'                                                                                                                                                                                                                                                                                                                                                                                                                                                                                                                                                                                                                                                                                         |
|------------|------------------------------------------------------------------------------------------------------------|-----------------------------------------------------------------------------------------------------------------------------------------------------------------------------------------------------------------------------------------------------------------------------------------------------------------------------------------------------------------------------------------------------------------------------------------------------------------------------------------------------------------------------------------------------------------------------------------------------------------------------------------------------------------------------------------------------------|
| SB-GB001   | integrate crl with R51A mutation in the chromosome, in place of the kan-pBad-kid cassette at the crl locus | TCCTTCAGGAAATCACCAGCTGGATCGAAAAACGCTTGTGTTAAAAATTTGCTAAAT<br>TTTGCCAATTTGGTAAAACAGTTGCATCACAACAGGAGATAGCAatgACGTTACCG<br>AGTGGACACCCGAAGAGCAGATTGATCAAAAAATTTACCGCACTAGGCCCGGTATA<br>TTCTGTGAAGGTAAGTGCAAAGATAATCGATTCTTTTTCGATTGCTGGCTGTATGC<br>GTCAACGTGAAACCCGGCACCGGAAGTgcccGAATTCTGGGGCTGGTGGATGGAG<br>CTGGAAGCGCAGGAATCCCGTTTTACCTACAGTTACCAGTTTGGTCTGTCCGATAA<br>AGCAGGCGACTGGAAGAGTGTCCGGTAAAAGACTGAAGTGGTTGAACGACT<br>GGAGCACACCCTGCGTGAGTTTACGAGAAGCTGCGTGAAGTCTGACGACGCT<br>GAATCTGAAGCTGGAACCCGGCGATGATTTTTCTGACGAGCCGGTGAAGTTAAC<br>GGCGTgaGTGAAATGTCCGGATGCATCACATCCGGCAATATTCATTAATAACTGAT<br>ACGTCATGCCAACCCGGACAATATCATCATTATTAATATTCATTTGTTAT                                           |
| SB-GB002   | integrate Δcrl in the chromosome, in place of the kan-pBad-kid cassette at the crl locus                   | TCCTTCAGGAAATCACCAGCTGGATCGAAAAACGCTTGTGTTAAAAATTTGCTAAAT<br>TTTGCCAATTTGGTAAAACAGTTGCATCACAACAGGAGATAGCAGTGAATGTGC<br>CGGATGCATCACATCCGGCAATATTCATTAATAACTGATACGTCATGCCAACCCGCA<br>CAATATCATCATTATTAATATTCATTTGTTAT                                                                                                                                                                                                                                                                                                                                                                                                                                                                                      |
| SB-GB003   | integrate crl in the chromosome, in place of the kan-pBad-kid cassette at the crl locus                    | TCCTTCAGGAAATCACCAGCTGGATCGAAAAACGCTTGTGTTAAAAATTTGCTAAAT<br>TTTGCCAATTTGGTAAAACAGTTGCATCACAACAGGAGATAGCAatgACGTTACCG<br>AGTGGACACCCGAAGAGCAGATTGATCAAAAAATTTACCGCACTAGGCCCGGTATA<br>TTCTGTGAAGGTAAGTGCAAAGATAATCGATTCTTTTTCGATTGCTGGCTGTATGC<br>GTCAACGTGAAACCCGGCACCGGAAGTgcccGAATTCTGGGGCTGGTGGATGGAG<br>CTGGAAGCGCAGGAATCCCGTTTTACCTACAGTTACCAGTTTGGTCTGTCCGATAA<br>AGCAGGCGACTGGAAGAGTGTCCGGTAAAAGACTGAAGTGGTTGAACGACT<br>GGAGCACACCCTGCGTGAGTTTACGAGAAGCTGCGTGAAGTCTGACGACGCT<br>GAATCTGAAGCTGGAACCCGGCGATGATTTTTCTGACGAGCCGGTGAAGTTAAC<br>GGCGTgaGTGAAATGTCCGGATGCATCACATCCGGCAATATTCATTAATAACTGAT<br>ACGTCATGCCAACCCGGACAATATCATCATTATTAATATTCATTTGTTAT                                           |
| SB-GB005   | ΔP2 PrssB. To be used in Gibson assembly with primers SB-92+93 on pSB37                                    | TTCAGTATGCGCAAATCCGGCCATCAATTCGGCACGTAACGCCGCTGCTCCACAA<br>GAGGGATGCCAGGCTTTTAAATAATCTGCGTCTTGCATCACAACAGCCAGT<br>AACCGGAACGCATGAGATGTTCTGGATCAGGTGCAACCTTTTACCAGacTACCAC<br>AGGGACAAAGCTGAGACAAAATAATCTCCCTGGAAACAATAACGGCGTATTAAC<br>CGCTGAGTAGCACTATGTTAACCGAGCAGTAGCGATGTGGTACGATTGCATTC<br>CAGGGGAATCTTCCGGGAATAATGAGAAAGATAAAAATAGGGC                                                                                                                                                                                                                                                                                                                                                               |
| SB-GB006   | ΔP1 PrssB. To be used in Gibson assembly with primers SB-94+95 on pSB37                                    | CCTGTTTGCCCGCAAATATCTACGCTTGAATTCATCGCGCCGCGCTGCCATTGC<br>GGCCGGACAGCTGGCAGTGGAAGGAAATGGACGAACCTTTGCGTTGGTACG<br>CACCACATTTGACCGAATTTTTATCTACACTTAAGTTAATTCGaaAGCCAGTCA<br>GGGAGAGAACatgACCGAGCCATTGGTCGAAAAGTGAGCAAGGGCGAGGAG<br>GATAACATGGCCATCATCAAGGAGTTTCATGCGCTCAAGGTGCATGGAGGGCT<br>CCGTGAACGGCCACGAGTTCGAGATCGAGGGCGAGGGCG                                                                                                                                                                                                                                                                                                                                                                        |
| SB-GB008   | integrate RssB D58P into NM1000 rssB N1-168 AA::kanKid (strain #AT485)                                     | CTACACTTAAGTTAATCTGACAGGCGCAGGTGGCAATAGCATGCCACTATTGAG<br>TAAAGCCAGTCAGGGGAGAGAAcAtgACGCAGCCATTGGTCGAAAACAGATTCT<br>CATTGTTGAAGATGAGCAGGTATTTGCTCGCTTCTGGATTGATGTTTTCTCATT<br>GGGAGCGACAACGGTACTGGCGGCTGATGGGGTGGATGCCCTTGAGTTGCTGGG<br>AGGTTTCACTCCAGACCTGATGATATGccATCGCGATGCCACGAATGAACGGGC<br>TTAACTGCTGGAGCATATACGTAACAGAGGGCAGCCAGCCAGTTGCTGGTAT<br>ATCTGCCACTGAAAATATGGCAGATATTGCCAAAGCGTTACGTCGCGGCTTGA<br>GATGTTTTGCTGAAACCGTAAAGATCTGAATCGCTTCCGCGAGATGTTTTTGC<br>CTGTCTATCCAGCATGTTAATTCGCGGCTTGGAGGAAGAGGAAAGGCTTTTTTC<br>GCGACTGGGATGCAATGGTTGATAACCTGCCGAGCGGCAAAATATTACAGG<br>AACTACAACCGCGGTTGAGCAGGTGATTTCCATTGCCGGTTAATTATCGTCAA<br>TTGGTTGCCCGGACAAACCCGGCCTGGTGCTGATATTGCCGCATTTCCGG  |
| SB-GB009   | integrate RssB D58E into NM1000 rssB N1-168 AA::kanKid (strain #AT485)                                     | CTACACTTAAGTTAATCTGACAGGCGCAGGTGGCAATAGCATGCCACTATTGAG<br>TAAAGCCAGTCAGGGGAGAGAAcAtgACGCAGCCATTGGTCGAAAACAGATTCT<br>CATTGTTGAAGATGAGCAGGTATTTGCTCGCTTCTGGATTGATGTTTTCTCATT<br>GGGAGCGACAACGGTACTGGCGGCTGATGGGGTGGATGCCCTTGAGTTGCTGGG<br>AGGTTTCACTCCAGACCTGATGATATGgaaATCGCGATGCCACGAATGAACGGG<br>CTTAACTGCTGGAGCATATACGTAACAGAGGGCAGCCAGCCAGTTCTGGTGA<br>TATCTGCCACTGAAAATATGGCAGATATTGCCAAAGCGTTACGTCGCGGCTTGA<br>AGATGTTTTGCTGAAACCGTAAAGATCTGAATCGCTTCCGCGAGATGTTTTTGC<br>CCTGTCTATCCAGCATGTTAATTCGCGGCTTGGAGGAAGAGGAAAGGCTTTTT<br>CGGACTGGGATGCAATGGTTGATAACCTGCCGAGCGGCAAAATATTACAGG<br>AACTACAACCGCGGTTGAGCAGGTGATTTCCATTGCCGGTTAATTATCGTCAA<br>TTGGTTGCCCGGACAAACCCGGCCTGGTGCTGATATTGCCGCATTTCCGG |
| SB-GB010   | integrate RssB D58A into NM1000 rssB N1-168 AA::kanKid (strain #AT485)                                     | CTACACTTAAGTTAATCTGACAGGCGCAGGTGGCAATAGCATGCCACTATTGAG<br>TAAAGCCAGTCAGGGGAGAGAAcAtgACGCAGCCATTGGTCGAAAACAGATTCT<br>CATTGTTGAAGATGAGCAGGTATTTGCTCGCTTCTGGATTGATGTTTTCTCATT<br>GGGAGCGACAACGGTACTGGCGGCTGATGGGGTGGATGCCCTTGAGTTGCTGGG<br>AGGTTTCACTCCAGACCTGATGATATGgccATCGCGATGCCACGAATGAACGGGC<br>TTAACTGCTGGAGCATATACGTAACAGAGGGCAGCCAGCCAGTTCTGGTAT<br>ATCTGCCACTGAAAATATGGCAGATATTGCCAAAGCGTTACGTCGCGGCTTGA<br>GATGTTTTGCTGAAACCGTAAAGATCTGAATCGCTTCCGCGAGATGTTTTTGC<br>CTGTCTATCCAGCATGTTAATTCGCGGCTTGGAGGAAGAGGAAAGGCTTTTTTC<br>GCGACTGGGATGCAATGGTTGATAACCTGCCGAGCGGCAAAATATTACAGG<br>AACTACAACCGCGGTTGAGCAGGTGATTTCCATTGCCGGTTAATTATCGTCAA<br>TTGGTTGCCCGGACAAACCCGGCCTGGTGCTGATATTGCCGCATTTCCGG  |
| SB-GB047   | integrate Δrsd in the chromosome                                                                           | ATCCATAGCTTTCACACTACCTTTGCATCACTGGCATGTTTAAACATGTTTTACAT<br>TTCTCACTGAGCAGTTTTTGAATAACAACCTGGGAGTCAATCGTTCTGCGCTGTT<br>AACCGTAATTTACATTCATGCCCATTTTCCGGGGCTAATTTCTGTCGGAGTGC<br>CTTAACTGGCTGAGACCGTTTTATTCCGGGATC                                                                                                                                                                                                                                                                                                                                                                                                                                                                                         |
